# Supplementary material for: P2-type Na2/3Ni1/3Mn2/3O2 as a cathode material with high-rate and long-life for sodium ion storage
Source: Royal Society of Chemistry journal article supplement (doi:10.1039/c8ta11927a), 2019-01-01
Supplement: c8ta11927a1.pdf [file c8ta11927a1.pdf]

## Supporting information

### **P2-type $\text{Na}_{2/3}\text{Ni}_{1/3}\text{Mn}_{2/3}\text{O}_2$ as cathode materials with high-rate and long-life for sodium ion storage**

Qiannan Liu,<sup>1,2</sup> Zhe Hu,<sup>2</sup> Mingzhe Chen,<sup>2</sup> Chao Zou,<sup>\*,1</sup> Huile Jin,<sup>1</sup> Shun Wang,<sup>1</sup> Qinfen Gu,<sup>3</sup>  
and Shulei Chou,<sup>\*,2</sup>

<sup>1</sup> College of Chemistry and Materials Engineering, Wenzhou University, Wenzhou, Zhejiang 325027, China

<sup>2</sup> Institute for Superconducting and Electronic Materials, Australian Institute for Innovative Materials, University of Wollongong, Innovation Campus, Squires Way, North Wollongong, NSW 2522, Australia

<sup>3</sup> Australian Synchrotron, 800 Blackburn Road, Clayton, VIC 3168, Australia

**Table S1.** Values of structure parameters obtained from XRD refinement of NNMO.

|   |    |     | x       | y       | z       | Occupation | Site |
|---|----|-----|---------|---------|---------|------------|------|
| 1 | Na | Na2 | 0.66667 | 0.33333 | 0.25000 | 0.340      | 2d   |
| 2 | Na | Na1 | 0.00000 | 0.00000 | 0.25000 | 0.322      | 2b   |
| 3 | Mn | Mn1 | 0.00000 | 0.00000 | 0.00000 | 0.665      | 2a   |
| 4 | O  | O1  | 0.66667 | 0.33333 | 0.08388 | 0.980      | 4f   |
| 5 | Ni | Ni1 | 0.00000 | 0.00000 | 0.00000 | 0.361      | 2a   |

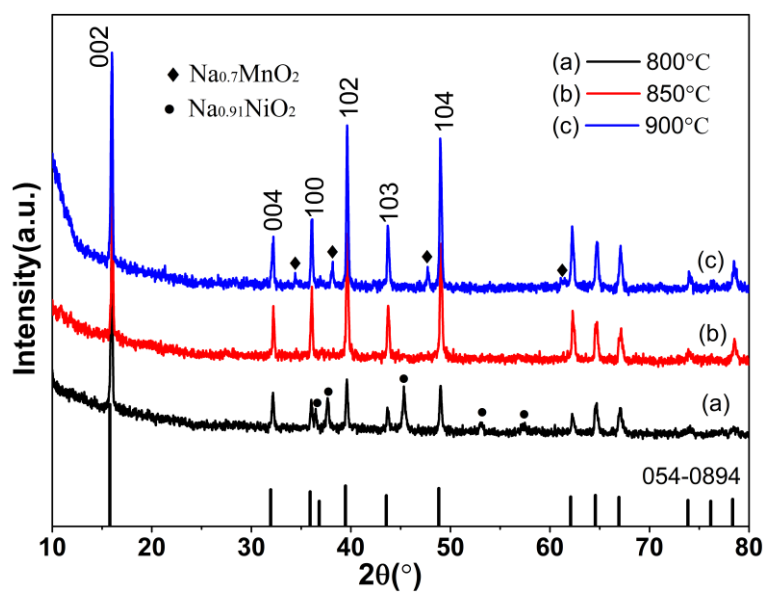

**Figure S1.** XRD patterns of NNMO prepared at different temperatures.

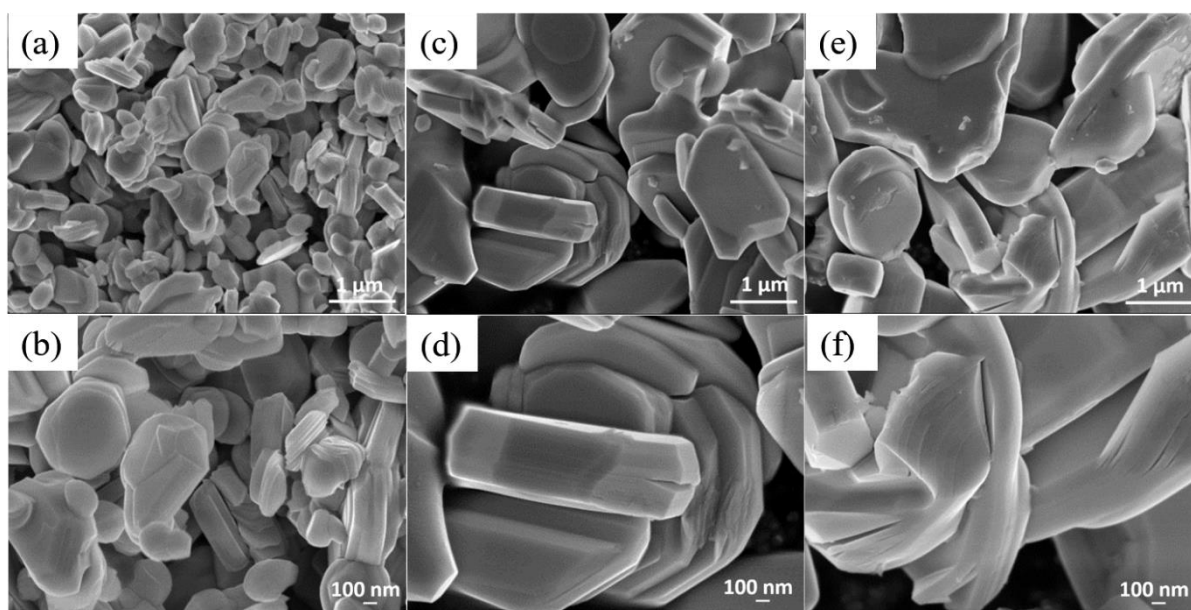

**Figure S2.** SEM morphologies of NNMO powders calcined at different temperatures: (a, b) 800; (c, d) 850; and (e, f) 900°C.

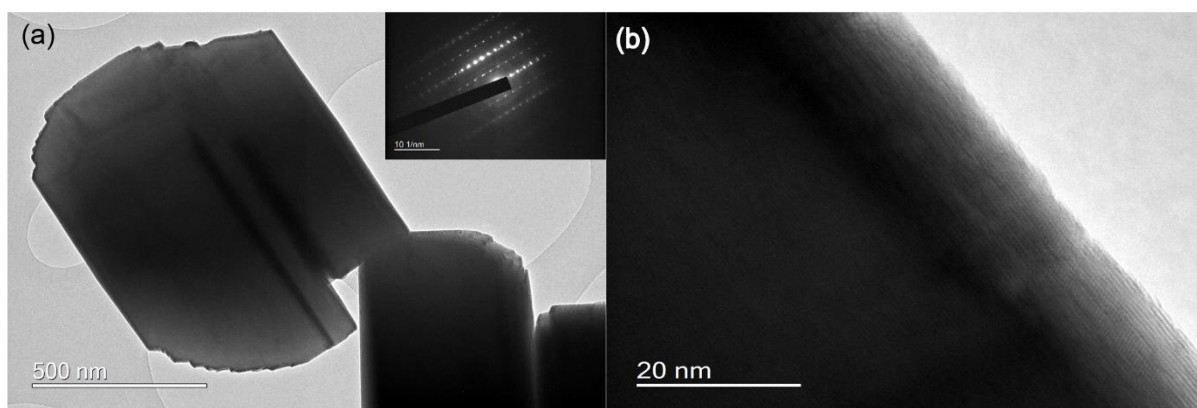

**Figure S3.** (a) TEM image and (b) high resolution TEM image showing lattice fringes of NNMO prepared at 850°C (inset: SADE pattern).

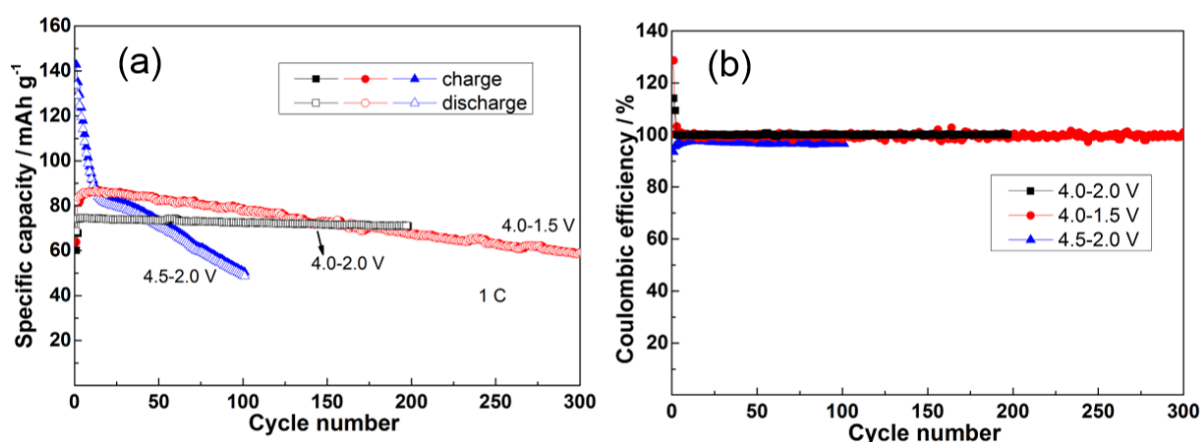

**Figure S4.** (a) Cycling performance and (b) corresponding CE of prepared NNMO with different cut-off voltages at 1 C.

**Table S2.** Comparison among electrochemical performances of selected reported P2-type  $\text{Na}_{2/3}\text{Ni}_{1/3}\text{Mn}_{2/3}\text{O}_2$  materials.

| Ref. | Electrolyte                                | Voltage range (V) | Discharge capacity ( $\text{mAh g}^{-1}$ )/current density ( $\text{mA g}^{-1}$ )/cycle number | Rate capacity ( $\text{mAh g}^{-1}$ )/current density ( $\text{mA g}^{-1}$ ) |
|------|--------------------------------------------|-------------------|------------------------------------------------------------------------------------------------|------------------------------------------------------------------------------|
| [S1] | 1 M $\text{NaPF}_6$ in EC:DEC (3:7, v/v)   | 4.5-2.0           | 104.5/10/30 <sup>th</sup>                                                                      | -                                                                            |
| [S2] | 1 M $\text{NaClO}_4$ in PC:FEC (95:5, v/v) | 4.0-2.0           | 80/17/200 <sup>th</sup>                                                                        | 81/173                                                                       |
| [S3] | 1 M $\text{NaClO}_4$ in PC:FEC (98:2, v/v) | 3.75-1.5          | 123.5/17/50 <sup>th</sup>                                                                      | 98.9/173                                                                     |
| [S4] | 1 M $\text{NaPF}_6$ in PC                  | 4.5-2.0           | 134/13/50 <sup>th</sup>                                                                        | ~125/260                                                                     |
| [S5] | 1 M $\text{NaPF}_6$ in PC                  | 4.5-2.3           | 52/8.6/100 <sup>th</sup>                                                                       | 78.5/86.5                                                                    |

|                      |                           |         |                         |           |
|----------------------|---------------------------|---------|-------------------------|-----------|
| Our work             | 1 M NaClO <sub>4</sub> in | 4.0-2.0 | 89/17/100 <sup>th</sup> | 60.7/1730 |
| EC:DEC:FEC           |                           |         |                         |           |
| (48.5:48.5:3, v/v/v) |                           |         |                         |           |

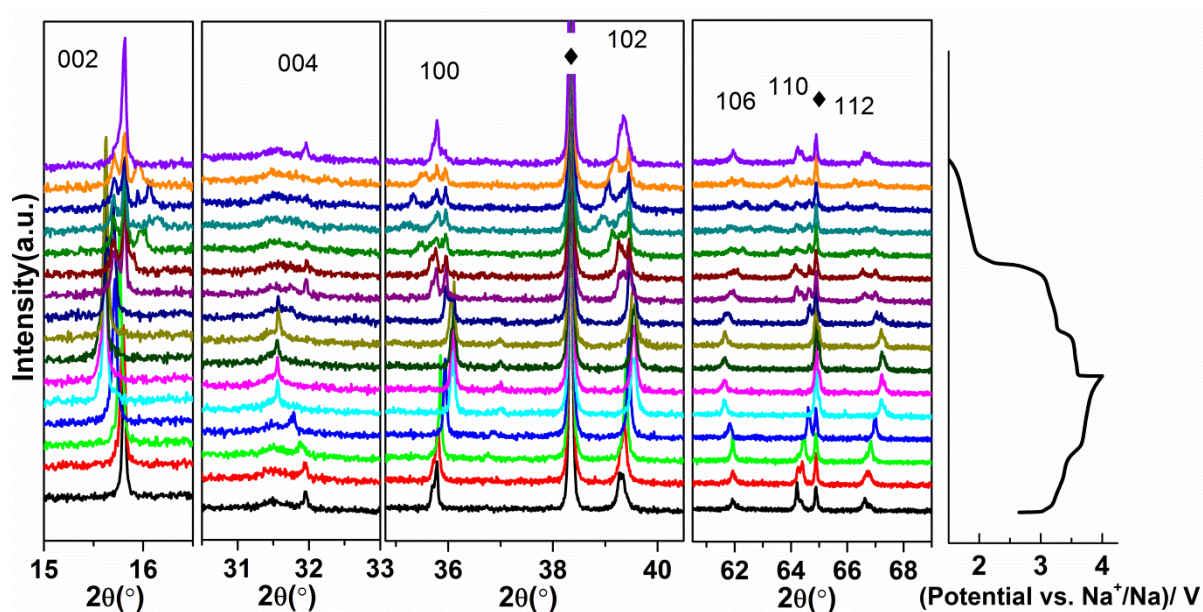

**Figure S5.** *In-situ* synchrotron XRD patterns of NNMO cycling between 4.0 and 1.5 V, the  $2\theta$  has been converted based on the Cu wavelength for convenience.

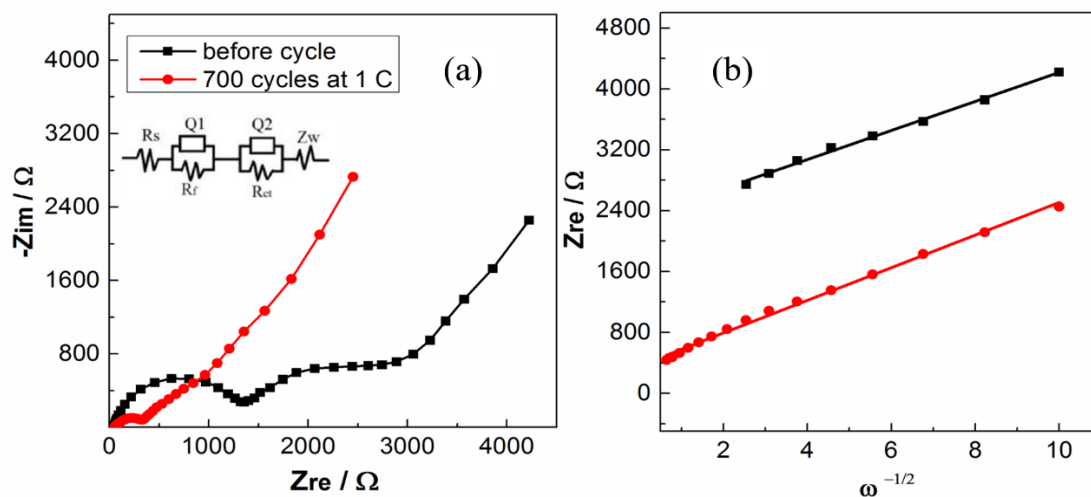

**Figure S6.** (a) Nyquist plots of prepared NNMO at 850°C before and after 700 cycles at 1 C (inset: equivalent circuit); and (b) corresponding  $Z_{re}$  vs.  $\omega^{-1/2}$  plots in the low frequency region.

**Table S3.** Values of fitted parameters obtained from EIS.

|                         | $R_s (\Omega)$ | $R_f (\Omega)$ | $R_{ct} (\Omega)$ | $D_{Na^+} (cm^2 s^{-1})$ |
|-------------------------|----------------|----------------|-------------------|--------------------------|
| Before cycle            | 53.32          | 882.9          | 1161              | $9.02 \times 10^{-12}$   |
| After 700 cycles at 1 C | 52.99          | 41.44          | 178.5             | $7.15 \times 10^{-12}$   |

Figure S6a shows the EIS Nyquist plots of prepared NNMO before and after 700 cycles at 1 C between 4.0-2.0 V with the equivalent circuit inset at the open circuit potential (OCP). The Nyquist plot consists of two semicircles at high frequency area corresponding to the film resistance ( $R_f$ ) and charge transfer resistance ( $R_{ct}$ ), respectively. The inclined line at low frequency region is related to the Warburg impedance ( $Z_w$ ) associated with  $Na^+$  diffusion. The values of different parameters obtained from EIS plots are shown in Table S3. The value of  $R_f$  and  $R_{ct}$  both decreased after 700 cycles at 1 C, resulting from the enhanced contact between the electrolyte and cathode material and the stabilized layers of cathode material. The low  $R_{ct}$  at the electrode/electrolyte interface is favourable for the transfer of  $Na^+$  ions and electrons at the surface and the diffusion of liquid electrolyte. The apparent  $Na^+$  diffusion coefficient ( $D_{Na^+}$ ) can be calculated by the  $Z_{re}$  vs.  $\omega^{-1/2}$  plots in the low frequency region (Fig. S6b). The  $D_{Na^+}$  calculated for electrode before and after 700 cycles at 1 C at OCP are  $9.02 \times 10^{-12}$  and  $7.15 \times 10^{-12} cm^2 s^{-1}$ , respectively.

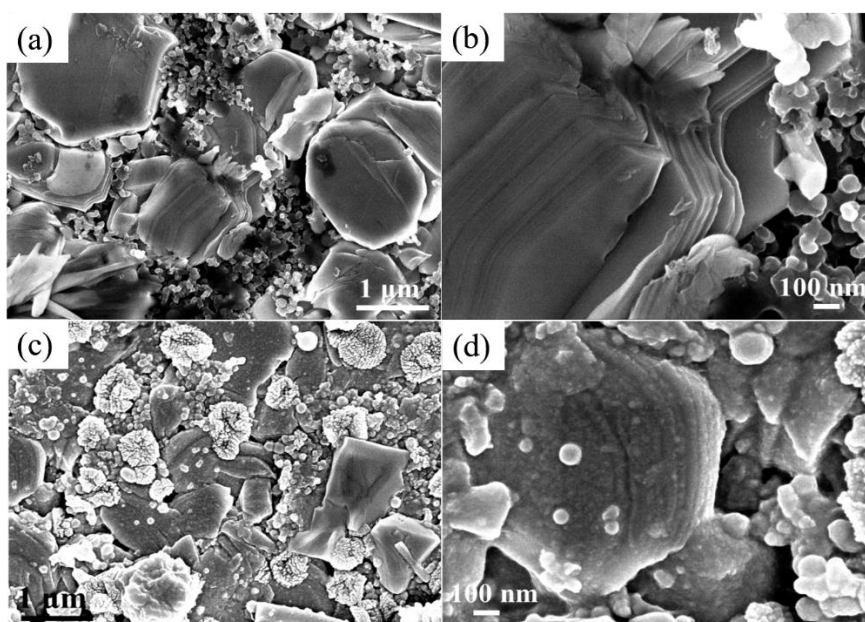

**Figure S7.** Electrodes before (a, b) and after (c, d) 1000 cycles at 1 C with super P and PVDF binder around.

## References

- S1. W. Zhao, H. Kirie, A. Tanaka, M. Unno, S. Yamamoto, H. Noguchi, *Mater. Lett.*, 2014, **135**, 131-134.
- S2. S. Y. Lee, J. H. Kim, Y. C. Kang, *Electrochim. Acta*, 2017, **225**, 86-92.
- S3. Y. Wen, B. Wang, G. Zeng, K. Nogita, D. Ye, L. Wang, *Chem. Asian J.*, 2015, **10**, 661-666.
- S4. Y. Yoda, K. Kubota, H. Isozumi, T. Horiba, S. Komaba, *ACS Appl. Mater. Interfaces*, 2018, **10**, 10986–10997.
- S5. J. Alvarado, C. Ma, S. Wang, K. Nguyen, M. Kodur, Y. S. Meng, *ACS Appl. Mater. Interfaces*, 2017, **9**, 26518–26530.
